# Supplementary material for: Detection of alpha- and betacoronaviruses in rodents from Yunnan, China
Source: Springer Nature journal article supplement (doi:10.1186/s12985-017-0766-9), 2017-05-26
Supplement: MOESM1 [file 12319030]

**Supplemental Materials:**

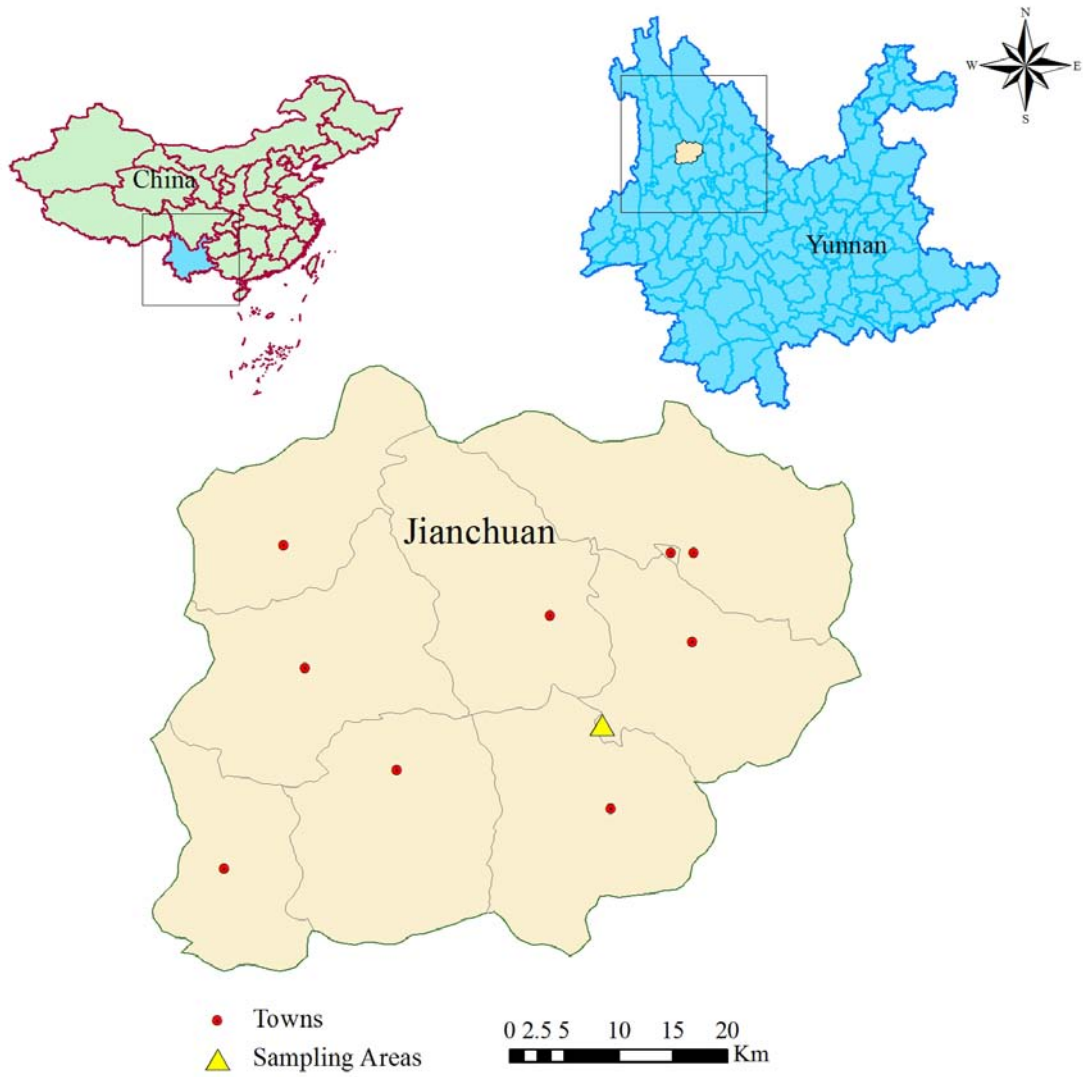

**Fig S1. Geographical map of Jianchuan country and the sampling areas.**

S1

S2

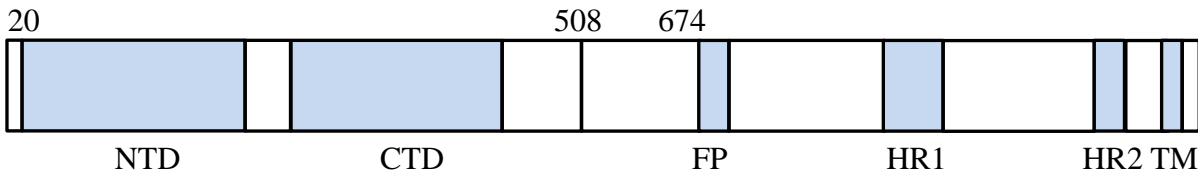

**JC34** : -----AIIIEVEMLITLYRCPEVFLCQVQCVDQLRQOE-----VVIENAVSIAIYTAIAVETFR-----HHHCSSSNSTPGDNKF-----NGIIEIVVHRNHP----- 84  
**HKU2** : -----MKRIFIVEMLRKYCCEDVY-----DFRLNFGIFSTSS-----RGLSITHTVILGASITMKAKRFPCTMVGSRVPE-----VGIIEAQAQASYSBT-----GSSG 87  
**HKU1** : -----MLIEIIEIIFPTLAVIGDNCIMFAINDINIVTFRISSEYVVDVSYGLGTYIILDRVYLIAIILPGLKGRKSGANFRDL5LKGTLSTLYIQKPEI-----SDENNEISIRVKNLKLIV-----NKTL 117  
**MHV-JHM** : -----MLVIEIIEIIFPSCGIYIGDERCIOTVNYNANASAPISISTEAVDVSKGLGTYIIVLDRVYLIAIILPGLKGRKSGANFRDL5LKGTLSTLYIQKPEI-----SEFNDSEIRVKNLKLIV-----PTGA 119  
**SARS-CoV** : -----MPEIIEIIEIIFLITLSSGDDLRCTTFDDQVAENYVQHTS-----SMRGVYVTFDEIRFDTLHLTQDLDLFFYSNMTVSGEHTHTNHPTGMFV-----IFPKDSEIFAARKTS----- 95  
**MERS-CoV** : MHSVIEIIEIIFLITLPTESVVDVGFPSVKSACIEVLIQVTFPDKTWFRPFDVSKADGIITYFQGRVYSLNITVYQGLIEVQGDHGMIVYSAGHATGTTPKLKVANYSDQVQKQAN-----GIVRIGAAANSTGVIIISFSTSATI 140

**JC34** : -----NIIHPAAVPAAPTNIK-----TIIIEPWHR-----AAQASTVIVQVYQQAQAVDLISGPRCEAPTNPCCS-AIVNMAIECLIIISIFRP-----TTFSS-FSYVITVNISE 175  
**HKU2** : -----AGGTFSSPKHVMN-----TISGIVVHRP-IGANIANVTRVGRWQKFSFNE-AHFQAPGESS-----AFECVLYVGSFSS-----SQHGKMPGVVNIWD 173  
**HKU1** : -----YSESTIIGSSVYI-----SIVTIVQPHNGVLEITACQITVQIYFHTICK-----KGSRRNBSWHDKSBLCLCFKKNITFYVSTDFW-----LIFHFYQGRGLIYAYI 213  
**MHV-JHM** : -----TSYIPTIIGSSVYI-----SIVTIVQPHNGVLEITACQITVQIYFHTICK-----KGSRRNBSWHDKSBLCLCFKKNITFYVSTDFW-----LIFHFYQGRGLIYAYI 217  
**SARS-CoV** : -----NIVRGNVPSSTNNK-----CSVYIINNSTNVVTRACN-----SIVTIVQPHNGVLEITACQITVQIYFHTICK-----KGSRRNBSWHDKSBLCLCFKKNITFYVSTDFW 209  
**MERS-CoV** : RKIIPAFVIGSSVYI-----SDGMRGRFNNHTLVLLPDGCGCTLLRAIYCLIEPRSGNHCAGNSITSPATYHTPATDCDGNVNRNASLNSKEYENLNRCNEMTYNITTEDELLEWFG-----ITQTAGVHLISRR 270

**JC34** : IIAVHIGQRFSFYIE-----FLMSNASAFICYDANG-----CIENIPNTTSDIIVSTSSANINPFLVCFDYSKIKRNLVLEIEPAVHGA--AIESSSYVAVNDLADAFSFAIDFSDGTGNYGGLIHFVFN 303  
**HKU2** : VRIIPPTVFEIQLVD-----QWEYVQFTGEPVNAGRMTRKVVVTEISVILVITLQSSANRYRYSYADGFPSCIKRLEIDPEFVYVSN--EYVPAVAVVHVHMSVQQRPEYSYGS--NYCEKRVVFN 300  
**HKU1** : ADSGATTELESYIITLLSHYVPLTCAISNTDNETLQWVPLSKRQILKFNIRVAVDVAQSSPFSCHQKSKLLLENTVEVYVSN--EYVPAVAVVHVHMSVQQRPEYSYGS--NYCEKRVVFN 352  
**MHV-JHM** : ADKPSATTELESYIITLLSHYVPLTCAISNTDNETLQWVPLSKRQILKFNIRVAVDVAQSSPFSCHQKSKLLLENTVEVYVSN--EYVPAVAVVHVHMSVQQRPEYSYGS--NYCEKRVVFN 354  
**SARS-CoV** : PGGENTLKEIKVPLIINTNFRALITAFSPADQIWGSAAMVPLKLPPTNPKYIENSGDAVDVCSQNPPLADLRKSVKSPEDKSLDNTNFRVYVSGDQVRFPTNITLQFGEVFNATK-PBSVYVBRKIK 348  
**MERS-CoV** : VBLVGNMFOEATLVYDYTIKYSIIPHSISIQSDRKAAMAAVYKLOPLTEGLDSEVSEIRRAILGDFNLDLHESYSEEDMSVLSVSEAKPSGSLVQAEQ-VEVCFSPILLSGTP--PQVYNRFLVFN 407

**JC34** : VVWVIE-----VFLCDDGLACIFNAIFSEVYINLQV-----DGL-----INPFLRCNGLDVIYIVKQCRAGVRYQLDFSDG-QEIPDAYTPEY----- 383  
**HKU2** : VVWVIE-----VFLCDDGLACIFNAIFSEVYINLQV-----DGL-----INPFLRCNGLDVIYIVKQCRAGVRYQLDFSDG-QEIPDAYTPEY----- 366  
**HKU1** : NENSTLLRLVHTDYSQVMPDESKVYGCCKSTVLDKFAIENSRRDDQLGSSGPTQSSNYKIDTPTSSSCQVYSPAINVIVNINYPSSWNRVYGFNN--FNLSSHVYVSRVYCFVSNVNTFCPAKPSFASCKSH 488  
**MHV-JHM** : NENSTLLRLVHTDYSQVMPDESKVYGCCKSTVLDKFAIENSRRDDQLGSSGPTQSSNYKIDTPTSSSCQVYSPAINVIVNINYPSSWNRVYGFNN--FNLSSHVYVSRVYCFVSNVNTFCPAKPSFASCKSH 493  
**SARS-CoV** : VADSVLYNTEFSEIKYQVGSATKINDLCESSVYADSEVVGDDVRLQAPGQGVYADVNYKLPDDPFCQVLAINTRMIDALSTGVNIVKYRLEHGKLR----- 449  
**MERS-CoV** : NYNPKLLSFSVNDIYCSQISPAALASNCSSVILIDYFSPYLSMKSDLSVSSAGPLSQNYKQSPSNPTCLLATPHNLTITPKPKYSYINRCSRLLS----- 508

**JC34** : -----VFLCDDGLACIFNAIFSEVYINLQV-----DGL-----INPFLRCNGLDVIYIVKQCRAGVRYQLDFSDG-QEIPDAYTPEY----- 383  
**HKU2** : -----VFLCDDGLACIFNAIFSEVYINLQV-----DGL-----INPFLRCNGLDVIYIVKQCRAGVRYQLDFSDG-QEIPDAYTPEY----- 366  
**HKU1** : -----VFLCDDGLACIFNAIFSEVYINLQV-----DGL-----INPFLRCNGLDVIYIVKQCRAGVRYQLDFSDG-QEIPDAYTPEY----- 488  
**MHV-JHM** : -----VFLCDDGLACIFNAIFSEVYINLQV-----DGL-----INPFLRCNGLDVIYIVKQCRAGVRYQLDFSDG-QEIPDAYTPEY----- 493  
**SARS-CoV** : -----VFLCDDGLACIFNAIFSEVYINLQV-----DGL-----INPFLRCNGLDVIYIVKQCRAGVRYQLDFSDG-QEIPDAYTPEY----- 449  
**MERS-CoV** : -----VFLCDDGLACIFNAIFSEVYINLQV-----DGL-----INPFLRCNGLDVIYIVKQCRAGVRYQLDFSDG-QEIPDAYTPEY----- 508

**JC34** : LKVRCVITDEVPQGLHTSNANITTFHNLLYG--DMVSHVRIK-IVSIVSVCNS--FYYSVLK-TRSEVGLDLSGANVNS--DVVTFERRAK-----ARTLTDSSGCLLVQVLTNNTYTSYEGCN 540  
**HKU2** : TGVCHITHEKRVITQGLVYESNPTFAQYINVLVYGG--SOLKRVRIIG-KVIEVAQCFE--ASYDVLFRSSSFGLDLRFDFCNRIRISASRFAERLLP-----SHNGTAAQGLNATYAPNDTHVNTNQLDGE 531  
**HKU1** : TGVCHITHEKRVITQGLVYESNPTFAQYINVLVYGG--SOLKRVRIIG-KVIEVAQCFE--ASYDVLFRSSSFGLDLRFDFCNRIRISASRFAERLLP-----SHNGTAAQGLNATYAPNDTHVNTNQLDGE 531  
**MHV-JHM** : TGVCHITHEKRVITQGLVYESNPTFAQYINVLVYGG--SOLKRVRIIG-KVIEVAQCFE--ASYDVLFRSSSFGLDLRFDFCNRIRISASRFAERLLP-----SHNGTAAQGLNATYAPNDTHVNTNQLDGE 531  
**SARS-CoV** : KNCVMPNENFLCQGLVITPS-SKRPQPPQFGRDVSDFDTSVDRPTEIILDSVCSFGVGSVITPGTNAKSEVAVLQDVNCDTSTAIHADQLTPAWRI--YSTGNVVFQDQALIGAEHV--DTSYEDLFGCA 655  
**MERS-CoV** : LKVRCVITDEVPQGLHTSNANITTFHNLLYG--DMVSHVRIK-IVSIVSVCNS--FYYSVLK-TRSEVGLDLSGANVNS--DVVTFERRAK-----ARTLTDSSGCLLVQVLTNNTYTSYEGCN 734

**JC34** : LKADVNTGMFVGN-----FYIOPHDDYARPIILSPQ-----IISVDDHVINVRKQVOTSAERFDVYCBRIYIDVSVCKEILDAKYGCCPKVSDIKSSSLQIYVQVQKIKINLVVDVVK-----PDVD 658  
**HKU2** : LKADVNTGMFVGN-----FYIOPHDDYARPIILSPQ-----IISVDDHVINVRKQVOTSAERFDVYCBRIYIDVSVCKEILDAKYGCCPKVSDIKSSSLQIYVQVQKIKINLVVDVVK-----PDVD 647  
**HKU1** : LKADVNTGMFVGN-----FYIOPHDDYARPIILSPQ-----IISVDDHVINVRKQVOTSAERFDVYCBRIYIDVSVCKEILDAKYGCCPKVSDIKSSSLQIYVQVQKIKINLVVDVVK-----PDVD 647  
**MHV-JHM** : LKADVNTGMFVGN-----FYIOPHDDYARPIILSPQ-----IISVDDHVINVRKQVOTSAERFDVYCBRIYIDVSVCKEILDAKYGCCPKVSDIKSSSLQIYVQVQKIKINLVVDVVK-----PDVD 647  
**SARS-CoV** : LKADVNTGMFVGN-----FYIOPHDDYARPIILSPQ-----IISVDDHVINVRKQVOTSAERFDVYCBRIYIDVSVCKEILDAKYGCCPKVSDIKSSSLQIYVQVQKIKINLVVDVVK-----PDVD 647  
**MERS-CoV** : LKADVNTGMFVGN-----FYIOPHDDYARPIILSPQ-----IISVDDHVINVRKQVOTSAERFDVYCBRIYIDVSVCKEILDAKYGCCPKVSDIKSSSLQIYVQVQKIKINLVVDVVK-----PDVD 647

**JC34** : FGAENSMFES-----EPNG-----RSHEIDILEIYVITGEPFYQDYDCK--MNEIDILCKRYKGMVIEPVMDDTLTFSSAVAGSMTAGLSSGGQGVY-----SISAVAGRLNAGLQVATVNDVNR 778  
**HKU2** : TRDRNMQFPLPVQVSTSRPFS-----RSHEIDILEIYVITGEPFYQDYDCK--MNEIDILCKRYKGMVIEPVMDDTLTFSSAVAGSMTAGLSSGGQGVY-----SISAVAGRLNAGLQVATVNDVNR 775  
**HKU1** : VDNINRKSIVGCLGPHCGSS-----RSHEIDILEIYVITGEPFYQDYDCK--MNEIDILCKRYKGMVIEPVMDDTLTFSSAVAGSMTAGLSSGGQGVY-----SISAVAGRLNAGLQVATVNDVNR 1008  
**MHV-JHM** : IDGNIPELPGCGTACBDGNGPSAIRGSAIEDLLEKVKLSVDFVBAANVCGGG--SEIRDLDCVSENGRVLPELLESQSGTAAATVAAHPPNAAAGVPE-----SISAVAGRLNAGLQVATVNDVNR 1025  
**SARS-CoV** : FGGNPSQILPDLKPTR-----RSHEIDILEIYVITGEPFYQDYDCK--MNEIDILCKRYKGMVIEPVMDDTLTFSSAVAGSMTAGLSSGGQGVY-----SISAVAGRLNAGLQVATVNDVNR 905  
**MERS-CoV** : GGDNIPELPGCGTACBDGNGPSAIRGSAIEDLLEKVKLSVDFVBAANVCGGG--SEIRDLDCVSENGRVLPELLESQSGTAAATVAAHPPNAAAGVPE-----SISAVAGRLNAGLQVATVNDVNR 997

**JC34** : ANGFNNTQYVADGERTKISCAISAHOSVNNNAQCSQVQGTSENGFSAISNNFLVIAIRERLEAQMNDRLINGRMNIQNFVNYKISISESSQIILQSLVNECVVASSNRNGFCGCHTESMORAPDCTMFP 918  
**HKU2** : ANGFNNTQYVADGERTKISCAISAHOSVNNNAQCSQVQGTSENGFSAISNNFLVIAIRERLEAQMNDRLINGRMNIQNFVNYKISISESSQIILQSLVNECVVASSNRNGFCGCHTESMORAPDCTMFP 915  
**HKU1** : ARAFNNALISONGESANSAARATOSVNNNAQCSQVQGTSENGFSAISNNFLVIAIRERLEAQMNDRLINGRMNIQNFVNYKISISESSQIILQSLVNECVVASSNRNGFCGCHTESMORAPDCTMFP 1148  
**MHV-JHM** : ARAFNNALISONGESANSAARATOSVNNNAQCSQVQGTSENGFSAISNNFLVIAIRERLEAQMNDRLINGRMNIQNFVNYKISISESSQIILQSLVNECVVASSNRNGFCGCHTESMORAPDCTMFP 1165  
**SARS-CoV** : ANGFNNTQYVADGERTKISCAISAHOSVNNNAQCSQVQGTSENGFSAISNNFLVIAIRERLEAQMNDRLINGRMNIQNFVNYKISISESSQIILQSLVNECVVASSNRNGFCGCHTESMORAPDCTMFP 1045  
**MERS-CoV** : ANGFNNTQYVADGERTKISCAISAHOSVNNNAQCSQVQGTSENGFSAISNNFLVIAIRERLEAQMNDRLINGRMNIQNFVNYKISISESSQIILQSLVNECVVASSNRNGFCGCHTESMORAPDCTMFP 1137

**JC34** : HYLVEVNTTIDVETEGDLGN--NVCIAERDLELVKTIIRSDV--MHEITRNLNVCQATVNN-SVIWNGNFTSINQITBIEGEPETP--SEDESFEDLLNLELELOKKN--ITTEPPELLNLYIDRDEBLS 1048  
**HKU2** : HYLVEVNTTIDVETEGDLGN--NVCIAERDLELVKTIIRSDV--MHEITRNLNVCQATVNN-SVIWNGNFTSINQITBIEGEPETP--SEDESFEDLLNLELELOKKN--ITTEPPELLNLYIDRDEBLS 1046  
**HKU1** : HYLVEVNTTIDVETEGDLGN--NVCIAERDLELVKTIIRSDV--MHEITRNLNVCQATVNN-SVIWNGNFTSINQITBIEGEPETP--SEDESFEDLLNLELELOKKN--ITTEPPELLNLYIDRDEBLS 1046  
**MHV-JHM** : HYLVEVNTTIDVETEGDLGN--NVCIAERDLELVKTIIRSDV--MHEITRNLNVCQATVNN-SVIWNGNFTSINQITBIEGEPETP--SEDESFEDLLNLELELOKKN--ITTEPPELLNLYIDRDEBLS 1046  
**SARS-CoV** : HYLVEVNTTIDVETEGDLGN--NVCIAERDLELVKTIIRSDV--MHEITRNLNVCQATVNN-SVIWNGNFTSINQITBIEGEPETP--SEDESFEDLLNLELELOKKN--ITTEPPELLNLYIDRDEBLS 1046  
**MERS-CoV** : HYLVEVNTTIDVETEGDLGN--NVCIAERDLELVKTIIRSDV--MHEITRNLNVCQATVNN-SVIWNGNFTSINQITBIEGEPETP--SEDESFEDLLNLELELOKKN--ITTEPPELLNLYIDRDEBLS 1046

**JC34** : NVSGLHIVSEFENPKVQVTKHWYWIIAIFLVVILFSEFLMCCATCCGCGMLGSAONGCC-----TKPQTVEPKRHHVQ----- 1126  
**HKU2** : NVSGLHIVSEFENPKVQVTKHWYWIIAIFLVVILFSEFLMCCATCCGCGMLGSAONGCC-----TKPQTVEPKRHHVQ----- 1128  
**HKU1** : NVSGLHIVSEFENPKVQVTKHWYWIIAIFLVVILFSEFLMCCATCCGCGMLGSAONGCC-----TKPQTVEPKRHHVQ----- 1356  
**MHV-JHM** : NVSGLHIVSEFENPKVQVTKHWYWIIAIFLVVILFSEFLMCCATCCGCGMLGSAONGCC-----TKPQTVEPKRHHVQ----- 1376  
**SARS-CoV** : NVSGLHIVSEFENPKVQVTKHWYWIIAIFLVVILFSEFLMCCATCCGCGMLGSAONGCC-----TKPQTVEPKRHHVQ----- 1255  
**MERS-CoV** : NVSGLHIVSEFENPKVQVTKHWYWIIAIFLVVILFSEFLMCCATCCGCGMLGSAONGCC-----TKPQTVEPKRHHVQ----- 1353

Fig. S2

Fig S2. Alignment and predicted domains and cleavage sites of AcCoV-JC34 spike protein. NTD, N-terminal domain; RBD, receptor-binding domain; HR, heptad repeat; TM, transmembrane anchor. The signal peptide corresponds to residues 1 to 19. The cleavage sites were indicated by arrows.
